# Supplementary material for: Identification, Characterization and Expression Profiling of the RS Gene Family during the Withering Process of White Tea in the Tea Plant (Camellia sinensis) Reveal the Transcriptional Regulation of CsRS8
Source: Int J Mol Sci. 2022 Dec 22;24(1):202. doi: 10.3390/ijms24010202 (PMC9820808; doi:10.3390/ijms24010202)
Supplement: Supplementary file 1 [file ijms-24-00202-s001.zip › Supplementary Table.xlsx]

## Sheet: Table S1
Primer	sequence(5'-3')	Note
RS8pro-F	GGAGCATTTTACTTTAATTTTATAATCAGGT	promoter sequence
RS8pro-R	TGATATGAATGAATATGGAGTGTGATGATG
In-pAbAi-RS8-F	AAATGATGAATTGAAAAGCTTATATATAAATAAAAAAAT	pAbAi vector
In-pAbAi-RS8-R	ATACAGAGCACATGCCTCGATGATATGAATGAATATGG
q0036490-F	TCTTGCGGTGCGATTACTATGC	qRT-PCR
q0036490-R	CCACTCGATGTCTTTTGGGCT
q0002256-F	AGTTGTCGGGAGTGGTAGGTGT
q0002256-R	CGATTGGTGCGAAATGAAGGTT
q0006516-F	CAGCCCGATTGGGATATGTTT
q0006516-R	CAGCTCCTTGGCAGTTGAAGA
q0022856-F	AGCTATTCCCGACACGTTTTCA
q0022856-R	TTTCCCACCCGAGGTATCATCC
q0043340-F	TTCATTGACTGGTTTGGCTGG
q0043340-R	TTCACATTGTGGTGTTGCTTGG
q0016821-F	CAAGTTGTCGGGAGTGGTAGGT
q0016821-R	AGGTTTGGTTGTGGATGTGGAT
q0026983-F	CCACAGCCGAACATAGCAAAA
q0026983-R	GCACCAGCCAAACCAGTCAA
q0021637-F	TCTCTCCAACCTGGCGGCG
q0021637-R	TCGTCGCTTGCGTGAATGTAA
q0050491-F	CCGTGTAGGCTCATAAAGTTTGA
q0050491-R	AAAAATCATCCCCGACACGAC
Table S1: Primers used in this study

## Sheet: Table S2
Gene ID	Gene name	Animo acids number/aa	Molecular weight/kDa	Theoretical pI	Instability index	classifies the protein	Aliphatic index	GRAVY	Subcellular Localization
CSS0021637.1	CsRS1	773	84.8	5.9	36.38	stable	80.41	-0.154	cyto
CSS0036490.1	CsRS2	647	71.63	6.29	33.86	stable	76.06	-0.272	nucl
CSS0002256.1	CsRS3	756	83.41	5.35	35.43	stable	87.65	-0.127	chlo
CSS0006516.1	CsRS4	688	76.32	6.06	32.77	stable	80	-0.247	cyto
CSS0022856.1	CsRS5	717	80.4	6.77	43.12	unstable	75.16	-0.379	chlo
CSS0043340.1	CsRS6	752	82.41	5.38	30.41	stable	84.75	-0.148	cyto
CSS0016821.1	CsRS7	751	82.86	5.26	35.67	stable	88.22	-0.126	chlo
CSS0050491.1	CsRS8	771	84.92	6.21	34.45	stable	80.62	-0.154	cyto
CSS0026938.1	CsRS9	814	89.28	5.92	33.74	stable	84.05	-0.101	chlo
Table S2: Physicochemical information and bioinformatics analysis of CsRSs protein.
